# Supplementary figures and images for: The epidemiology of pulmonary tuberculosis in children in Mainland China, 2009–2015
Source: HighWire-hosted journal article supplement (doi:10.1136/archdischild-2019-317635), 2019-11-26

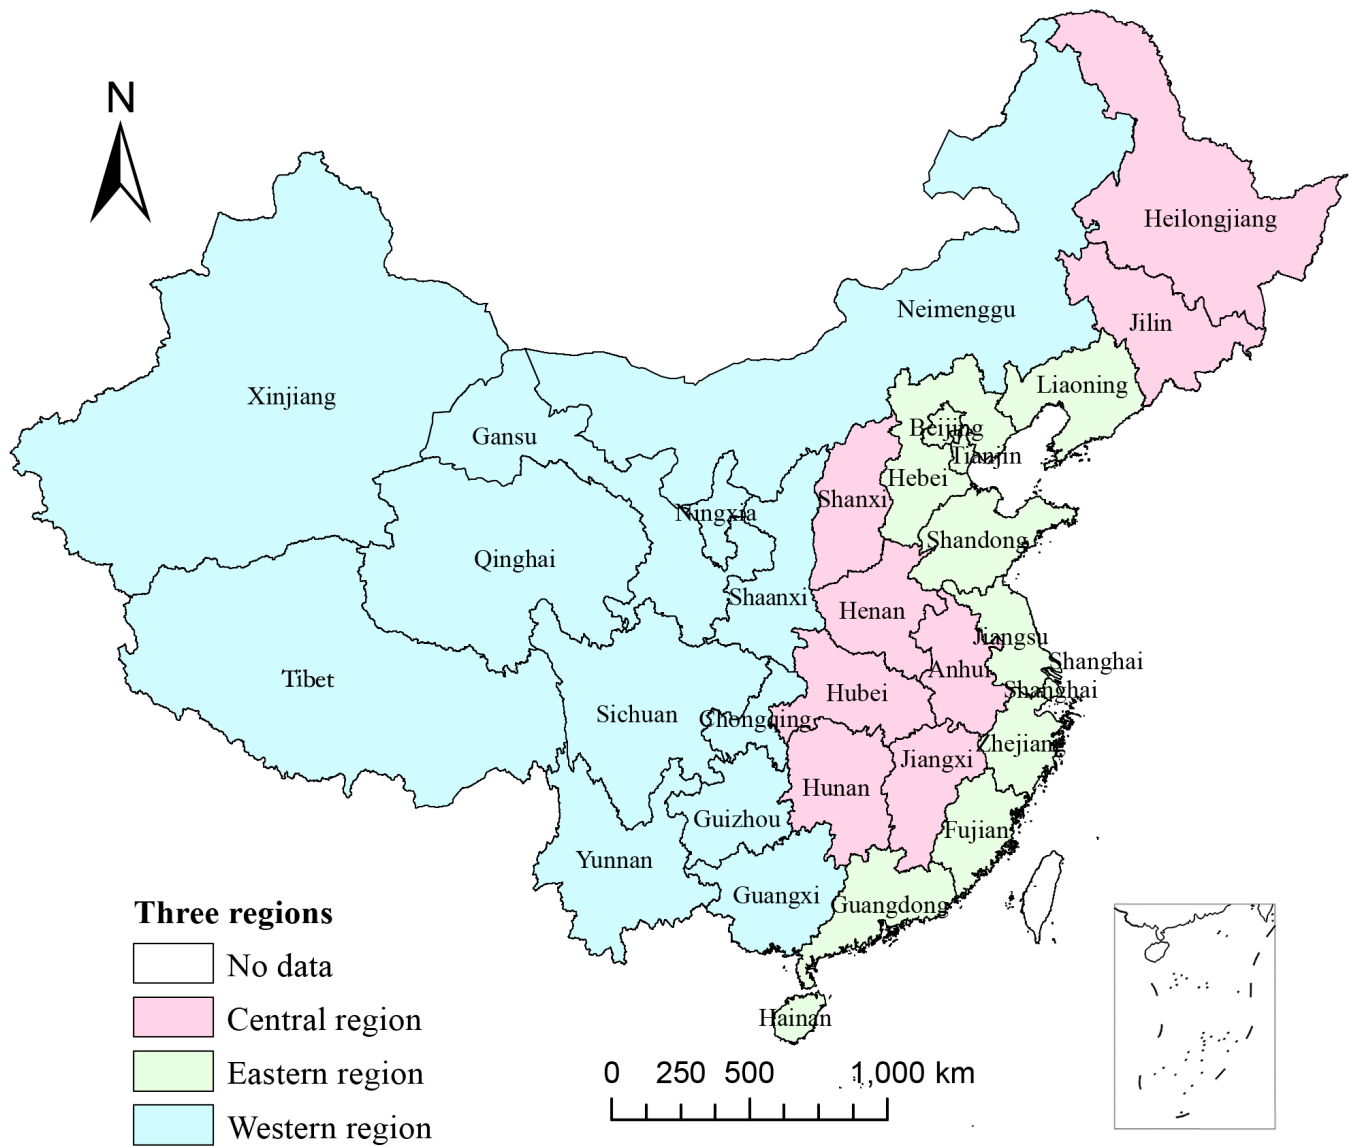

Supplement: archdischild-2019-317635supp001_data_supplement.pdf [file archdischild-2019-317635supp001_data_supplement.pdf]
